# Supplementary material for: A colloidal gold immunochromatographic strip for quantitative detection of azoxystrobin in vegetables
Source: Royal Society of Chemistry journal article supplement (doi:10.1039/d1nj01191j), 2021-01-01
Supplement: d1nj01191j1.pdf [file d1nj01191j1.pdf]

**A colloidal gold immunochromatographic strip for  
quantitative detection of azoxystrobin in vegetables**

**(Supplementary Material)**

## **Contents**

**Fig. S1** (a) The LC-MS results of AZX hapten; (b) <sup>1</sup>H NMR results of AZX hapten.

**Fig. S2** UV spectrum of AZX hapten, KLH, OVA, AZX hapten-KLH, and AZX hapten-OVA: (a) immunogen; (b) coating antigen.

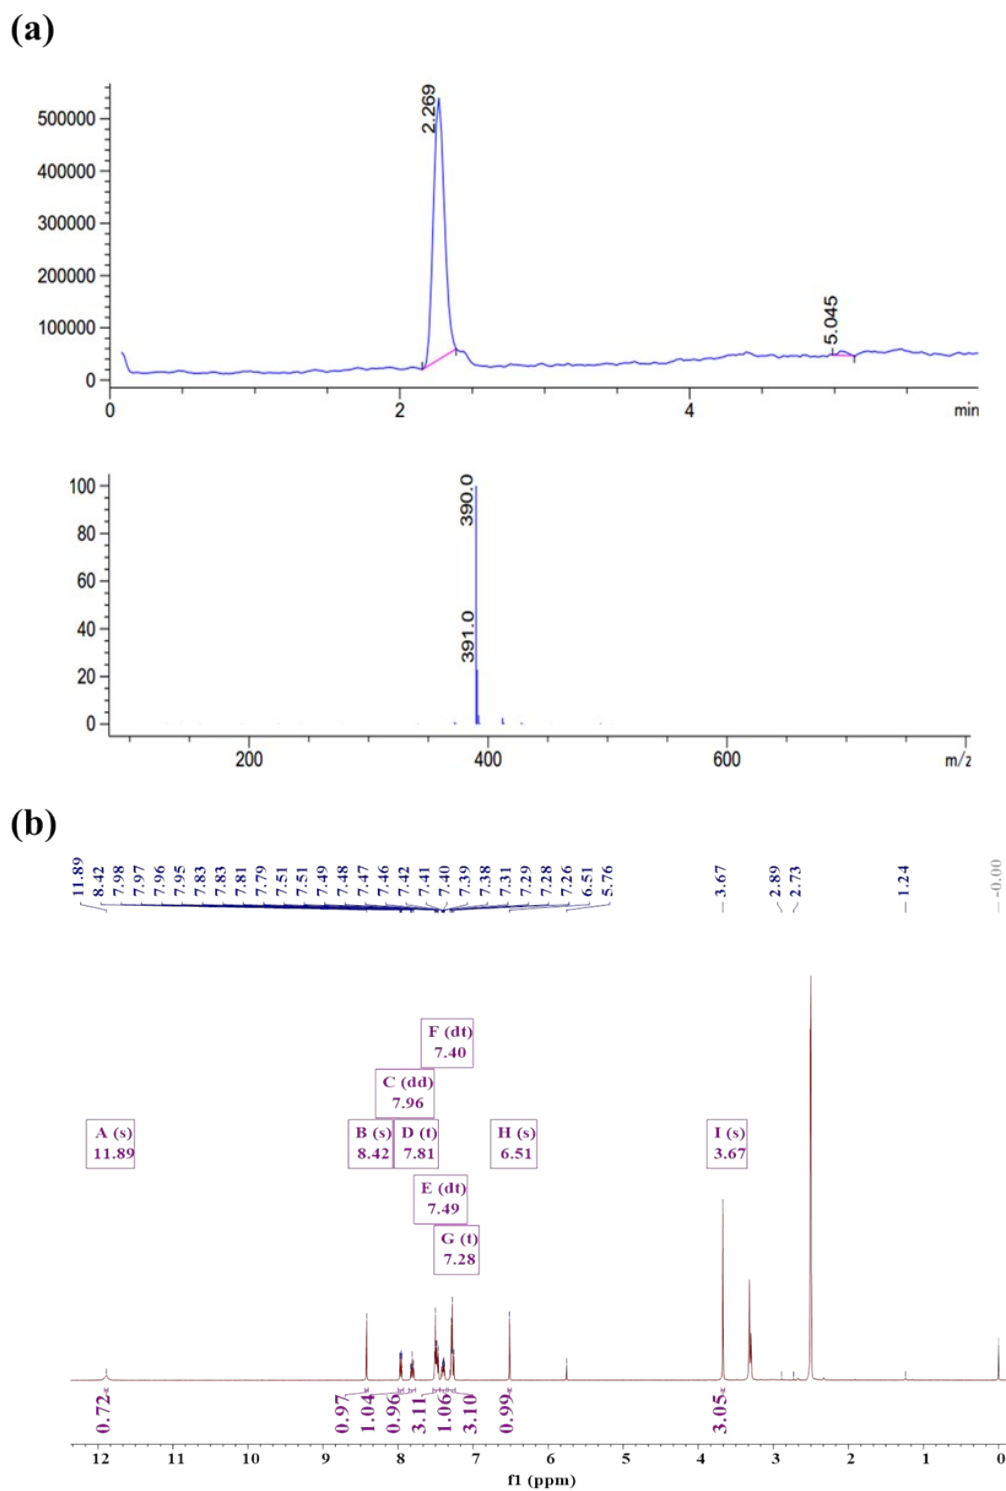

**Fig. S1.** (a) The LC-MS results of AZX hapten; (b)  $^1\text{H}$  NMR results of AZX hapten.

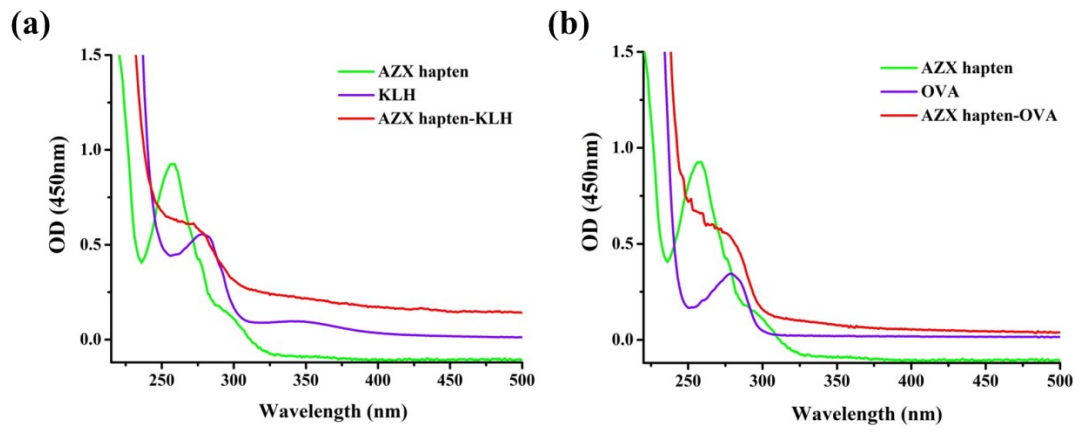

**Fig. S2.** UV spectrum of AZX hapten, KLH, OVA, AZX hapten-KLH, and AZX hapten-OVA: (a) immunogen; (b) coating antigen.
